# Supplementary material
Source: PubMed Central journal article supplement (PMC6293230)
Supplement: sbx190_suppl_supplementary_material.pdf [file sbx190_suppl_supplementary_material.pdf]

**7T proton magnetic resonance spectroscopy of the anterior cingulate cortex in  
minimally-treated first-episode schizophrenia**

Meredith A. Reid, PhD, Nouha Salibi, PhD, David M. White, MPH, MPA, Timothy J. Gawne,  
PhD, Thomas S. Denney, PhD, Adrienne C. Lahti, MD

**Supplementary Material**

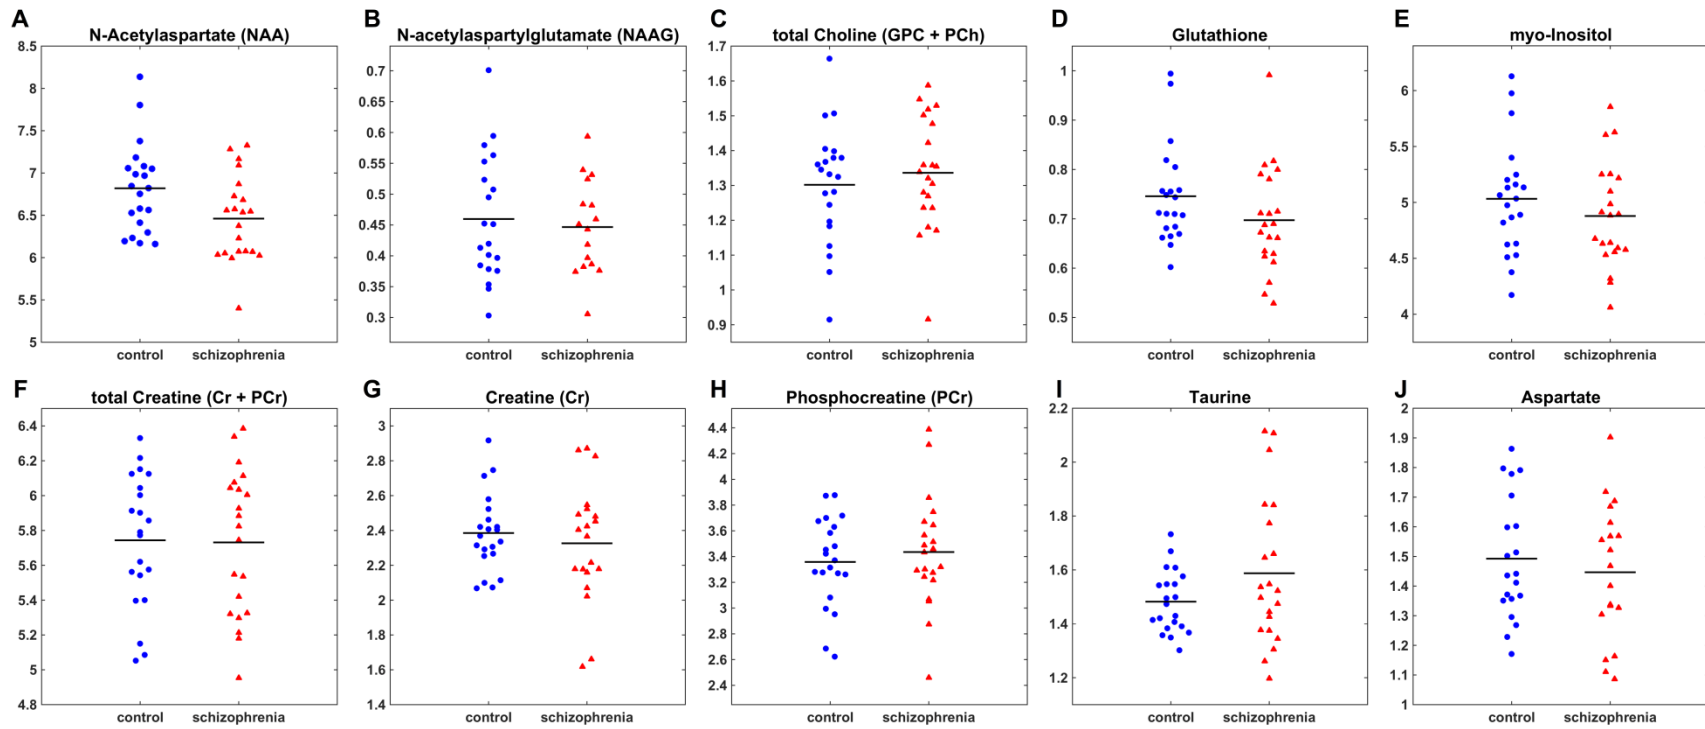

**Figure S1.** Metabolite levels in the dorsal anterior cingulate cortex (ACC) in controls and people with schizophrenia. (A) N-acetylaspartate (NAA), n.s. (B) N-acetylaspartylglutamate (NAAG), n.s. (C) Total choline (GPC + PCh), n.s. (D) Glutathione, n.s. (E) myo-Inositol, n.s. (F) Total creatine (Cr + PCr), n.s. (G) Creatine, n.s. (H) Phosphocreatine, n.s. (I) Taurine, n.s. (J) Aspartate, n.s.

**Table S1.** Correlations between metabolites and clinical variables<sup>a</sup>

| Clinical Measure <sup>b</sup>          | Metabolite | Group | <i>n</i> <sup>b</sup> | <i>r</i> | <i>p</i> -value | Benjamini-Hochberg critical value <sup>c</sup> |
|----------------------------------------|------------|-------|-----------------------|----------|-----------------|------------------------------------------------|
| RBANS Language                         | GABA       | SZ    | 18                    | -0.600   | 0.008           | 0.001                                          |
| RBANS Total                            | GABA       | SZ    | 18                    | -0.510   | 0.031           | 0.002                                          |
| RBANS Immediate Memory                 | Gln        | HC    | 19                    | -0.493   | 0.032           | 0.003                                          |
| RBANS Immediate Memory                 | GABA       | SZ    | 18                    | -0.504   | 0.033           | 0.004                                          |
| RBANS Delayed Memory                   | Glu        | HC    | 19                    | -0.455   | 0.050           | 0.005                                          |
| BPRS Positive                          | Glu        | SZ    | 19                    | 0.451    | 0.053           | 0.006                                          |
| RBANS Visuospatial /<br>Constructional | Glu        | SZ    | 18                    | -0.459   | 0.055           | 0.007                                          |
| RBANS Total                            | Gln        | HC    | 19                    | -0.429   | 0.067           | 0.008                                          |
| RBANS Delayed Memory                   | GABA       | SZ    | 18                    | -0.384   | 0.116           | 0.009                                          |
| RBANS Attention                        | GABA       | SZ    | 18                    | -0.382   | 0.117           | 0.010                                          |
| RBANS Language                         | Gln        | HC    | 19                    | -0.346   | 0.146           | 0.011                                          |
| RBANS Immediate Memory                 | Glu        | SZ    | 18                    | -0.352   | 0.152           | 0.013                                          |
| UPSA                                   | GABA       | SZ    | 17                    | -0.360   | 0.155           | 0.014                                          |
| RBANS Total                            | Glu        | SZ    | 18                    | -0.312   | 0.208           | 0.015                                          |
| BPRS Negative                          | GABA       | SZ    | 19                    | -0.247   | 0.308           | 0.016                                          |
| RBANS Total                            | Glu        | HC    | 19                    | -0.244   | 0.313           | 0.017                                          |
| RBANS Visuospatial /<br>Constructional | Gln        | HC    | 19                    | -0.231   | 0.341           | 0.018                                          |
| RBANS Immediate Memory                 | Gln        | SZ    | 18                    | -0.225   | 0.369           | 0.019                                          |
| RBANS Language                         | Glu        | HC    | 19                    | -0.215   | 0.376           | 0.020                                          |
| RBANS Language                         | GABA       | HC    | 19                    | -0.211   | 0.385           | 0.021                                          |
| RBANS Visuospatial /<br>Constructional | GABA       | HC    | 19                    | -0.191   | 0.434           | 0.022                                          |
| BPRS Total                             | Gln        | SZ    | 19                    | -0.189   | 0.439           | 0.023                                          |
| RBANS Attention                        | GABA       | HC    | 19                    | 0.181    | 0.457           | 0.024                                          |
| UPSA                                   | Gln        | SZ    | 17                    | -0.190   | 0.464           | 0.025                                          |
| BPRS Negative                          | Gln        | SZ    | 19                    | -0.173   | 0.478           | 0.026                                          |
| BPRS Total                             | GABA       | SZ    | 19                    | -0.170   | 0.486           | 0.028                                          |

| Clinical Measure <sup>b</sup>       | Metabolite | Group | <i>n</i> <sup>b</sup> | <i>r</i> | <i>p</i> -value | Benjamini-Hochberg critical value <sup>c</sup> |
|-------------------------------------|------------|-------|-----------------------|----------|-----------------|------------------------------------------------|
| RBANS Visuospatial / Constructional | GABA       | SZ    | 18                    | -0.175   | 0.486           | 0.027                                          |
| RBANS Delayed Memory                | Gln        | SZ    | 18                    | -0.173   | 0.491           | 0.029                                          |
| RBANS Visuospatial / Constructional | Gln        | SZ    | 18                    | -0.172   | 0.494           | 0.030                                          |
| RBANS Total                         | Gln        | SZ    | 18                    | -0.172   | 0.495           | 0.031                                          |
| RBANS Attention                     | Glu        | SZ    | 18                    | -0.166   | 0.511           | 0.032                                          |
| BPRS Total                          | Glu        | SZ    | 19                    | 0.120    | 0.624           | 0.033                                          |
| BPRS Negative                       | Glu        | SZ    | 19                    | -0.098   | 0.691           | 0.034                                          |
| RBANS Delayed Memory                | GABA       | HC    | 19                    | 0.096    | 0.695           | 0.035                                          |
| RBANS Language                      | Gln        | SZ    | 18                    | -0.085   | 0.739           | 0.036                                          |
| BPRS Positive                       | GABA       | SZ    | 19                    | 0.079    | 0.747           | 0.038                                          |
| RBANS Delayed Memory                | Gln        | HC    | 19                    | -0.070   | 0.775           | 0.039                                          |
| RBANS Immediate Memory              | Glu        | HC    | 19                    | -0.067   | 0.786           | 0.040                                          |
| RBANS Language                      | Glu        | SZ    | 18                    | -0.067   | 0.792           | 0.041                                          |
| UPSA                                | Glu        | SZ    | 17                    | -0.065   | 0.803           | 0.042                                          |
| BPRS Positive                       | Gln        | SZ    | 19                    | 0.056    | 0.821           | 0.043                                          |
| RBANS Delayed Memory                | Glu        | SZ    | 18                    | -0.049   | 0.846           | 0.044                                          |
| RBANS Attention                     | Gln        | HC    | 19                    | -0.039   | 0.875           | 0.045                                          |
| RBANS Attention                     | Glu        | HC    | 19                    | -0.034   | 0.889           | 0.046                                          |
| RBANS Total                         | GABA       | HC    | 19                    | -0.033   | 0.894           | 0.047                                          |
| RBANS Visuospatial / Constructional | Glu        | HC    | 19                    | -0.031   | 0.899           | 0.048                                          |
| RBANS Attention                     | Gln        | SZ    | 18                    | 0.022    | 0.932           | 0.049                                          |
| RBANS Immediate Memory              | GABA       | HC    | 19                    | 0.004    | 0.987           | 0.050                                          |

<sup>a</sup> Abbreviations: BPRS: Brief Psychiatric Rating Scale, GABA: gamma-aminobutyric acid, Glu: glutamate, Gln: glutamine, HC: healthy control, RBANS: Repeatable Battery for the Assessment of Neuropsychological Status, SZ: schizophrenia, UPSA: UCSD Performance-Based Skills Assessment

<sup>b</sup> RBANS was not available for 3 patients and 2 controls. BPRS was not available for 2 patients. UPSA was not available for 4 patients.

<sup>c</sup> False discovery rate  $p < 0.05$
